# Supplementary material
Source: Research Square preprint supplement (doi:10.21203/rs.3.rs-9415578/v1)
Supplement: Supplementary file 1 [file a449add92a5595de29a9ff67.docx]

**Online Resources**

**Online Resource 1.** Hardware failure definitions across all 13 included studies.

**Online Resource 2.** Sensitivity analysis: all studies vs. SINS-reporting studies.

**Online Resource 3.** Exploratory meta-regression of SINS as moderator (k = 6).

**Online Resource 4.** SINS-stratified descriptive analysis.

**Online Resource 5.** Complete search strategies for all five databases.
