# Supplementary material
Source: Research Square preprint supplement (doi:10.21203/rs.3.rs-9415578/v1)
Supplement: Supplementary file 2 [file d82b13671de0be43352935ca.pdf]

## Online Resource 5. Complete Search Strategies

*Search date: April 2026. No date or language restrictions applied.*

### PubMed/MEDLINE

((("spinal metastasis" OR "spinal metastases" OR "spine metastasis" OR "spine metastases" OR "metastatic spine" OR "vertebral metastasis" OR "vertebral metastases" OR "spinal tumor" OR "spinal tumour" OR "spine tumor" OR "spine tumour") AND ("cement augmented" OR "cement augmentation" OR "PMMA" OR "polymethylmethacrylate" OR "fenestrated screw" OR "fenestrated pedicle" OR "cannulated screw" OR "cannulated pedicle" OR "cement screw") AND ("hardware failure" OR "screw loosening" OR "screw pullout" OR "screw pull-out" OR "rod fracture" OR "construct failure" OR "implant failure" OR "mechanical complication" OR "instrumentation failure" OR "cage migration" OR "cage subsidence" OR "screw breakage" OR "fixation failure")))

*Results: 47 records*

### Embase

('spinal metastasis'/exp OR 'vertebral metastasis' OR 'metastatic spine disease') AND ('cement augmented pedicle screw' OR 'polymethylmethacrylate augmentation' OR 'fenestrated pedicle screw' OR 'cannulated pedicle screw' OR 'PMMA screw') AND ('hardware failure' OR 'screw loosening' OR 'implant failure' OR 'construct failure' OR 'mechanical complication' OR 'instrumentation failure' OR 'screw pullout' OR 'rod fracture')

*Results: 23 records*

### Cochrane CENTRAL

("spinal metastases" OR "spine metastases" OR "metastatic spine") AND ("cement augmented" OR "cement augmentation" OR "fenestrated screw" OR "PMMA" OR "polymethylmethacrylate") AND ("hardware failure" OR "screw loosening" OR "construct failure" OR "implant failure" OR "mechanical complication")

*Results: 4 records*

### Web of Science

TS=("spinal metastas\*" OR "spine metastas\*" OR "vertebral metastas\*" OR "metastatic spine") AND TS=("cement augment\*" OR "PMMA" OR "polymethylmethacrylate" OR "fenestrated screw\*" OR "fenestrated pedicle" OR "cannulated screw\*") AND TS=("hardware failure" OR "screw loosening" OR

"screw pullout" OR "rod fracture" OR "construct failure" OR "implant failure" OR "mechanical complication" OR "instrumentation failure")

*Results: 12 records*

### **Scopus**

TITLE-ABS-KEY(("spinal metastasis" OR "spinal metastases" OR "spine metastases" OR "metastatic spine") AND ("cement augmented" OR "cement augmentation" OR "PMMA" OR "polymethylmethacrylate" OR "fenestrated screw" OR "fenestrated pedicle" OR "cannulated screw") AND ("hardware failure" OR "screw loosening" OR "construct failure" OR "implant failure" OR "mechanical complication" OR "screw pullout" OR "rod fracture"))

*Results: 6 records*

**Total database records: 92**

**Additional records from citation searching: 4**

**Total records before deduplication: 96**

### **Supplementary citation searching**

Backward citation tracking was performed on all 13 included studies and on 3 relevant review articles identified during full-text screening. Reference lists were manually screened for additional eligible studies not captured by the electronic search. Four additional studies were identified through this process.
