# Supplementary material
Source: Research Square preprint supplement (doi:10.21203/rs.3.rs-9415578/v1)
Supplement: Supplementary file 3 [file de16da1d8d1cd9f3678c812b.pdf]

**Supplementary Table S1. Hardware Failure Definitions Across Included Studies (n = 13)**

| Study (Year)     | Arm         | N       | Hardware Failure Definition                                                                                                                                                                                      | HF Scope                               | Assessment Method                                   | FU                       | HF Rate      |
|------------------|-------------|---------|------------------------------------------------------------------------------------------------------------------------------------------------------------------------------------------------------------------|----------------------------------------|-----------------------------------------------------|--------------------------|--------------|
| Moussazadeh 2015 | CAPS        | 44      | Screw pullout on follow-up imaging; one case described as asymptomatic screw pull-out                                                                                                                            | Radiographic (any)                     | Follow-up X-ray                                     | NR                       | 2.3%         |
| Kim 2017         | CAPS        | 14      | Screw loosening, pullout, or displacement on follow-up imaging                                                                                                                                                   | Radiographic (any)                     | Follow-up X-ray / CT                                | NR                       | 0%           |
| Barzilai 2019    | CAPS        | 53      | Screw fracture, peri-screw lucency, rod fracture on postoperative CT                                                                                                                                             | Radiographic (any)                     | Postop CT                                           | 6–12 mo                  | 7.5%         |
| Massaad 2021     | CAPS        | 69      | Screw loosening, pullout, or failure; assessed on postoperative CT                                                                                                                                               | Radiographic (any)                     | Postop CT                                           | 25.3 mo (median)         | 0%           |
| Newman 2021      | CAPS        | 44      | Screw pullout, loosening, rod fracture, progressive kyphosis; included events requiring revision                                                                                                                 | Mixed (radiographic + symptomatic)     | Routine imaging + clinical                          | 12.9 mo (median)         | 9.1%         |
| Patel 2021       | CAPS / Ctrl | 10 / 9  | Construct failure identified on follow-up imaging; not further specified                                                                                                                                         | Radiographic (any)                     | Follow-up imaging                                   | NR                       | 0% / 0%      |
| Wagner 2021      | CAPS        | 51      | Screw loosening, screw breakage, rod fracture on follow-up imaging                                                                                                                                               | Radiographic (any)                     | Follow-up X-ray / CT                                | 8.5 mo (median)          | 11.8%        |
| Cady-McCrea 2021 | CAPS        | 8       | Construct integrity assessed on follow-up imaging; any mechanical complication                                                                                                                                   | Radiographic (any)                     | Follow-up imaging                                   | 4.9 mo (median)          | 0%           |
| Feng 2022        | CAPS / Ctrl | 28 / 24 | Screw loosening, rod breakage, cage displacement on follow-up X-ray/CT                                                                                                                                           | Radiographic (any)                     | Follow-up X-ray / CT                                | 12 mo                    | 3.6% / 29.2% |
| Bardeesi 2025    | CAPS        | 28      | Construct failure on follow-up imaging; screw loosening, migration, or rod fracture                                                                                                                              | Radiographic (any)                     | Follow-up imaging                                   | 11 mo (median)           | 0%           |
| Longo 2019       | Control     | 58      | Screw loosening, pullout, rod fracture on scheduled follow-up imaging                                                                                                                                            | Radiographic (any)                     | Follow-up imaging                                   | NR                       | 13.8%        |
| Kumar N 2021     | Control     | 246     | Broad radiographic: screw ploughing, loosening, cut-out, pull-out, breakage; cage subsidence/displacement/breakage; rod breakage; angular deformity >5°. Stratified into symptomatic (SF) vs asymptomatic (AsCF) | Radiographic (all failures, inclusive) | Routine imaging + clinical; competing risk analysis | 5 mo (median to failure) | 22.4%        |
| Kumar N 2023     | Control     | 200     | Symptomatic implant complications only: new-onset pain, neurological                                                                                                                                             | Symptomatic only                       | Clinical presentation                               | NR                       | ≈2%          |

| Study (Year) | Arm | N | Hardware Failure Definition                                            | HF Scope | Assessment Method | FU | HF Rate |
|--------------|-----|---|------------------------------------------------------------------------|----------|-------------------|----|---------|
|              |     |   | deficit, or ambulatory deterioration attributable to construct failure |          |                   |    |         |

**Abbreviations:** CAPS = cement-augmented pedicle screw; Ctrl = conventional (non-augmented) control; HF = hardware failure; FU = follow-up duration; NR = not reported; SF = symptomatic failure; AsCF = asymptomatic construct failure; CT = computed tomography.

**Note:** The nearly elevenfold difference in HF rates between Kumar N 2021 (22.4%, broad radiographic definition) and Kumar N 2023 ( $\approx 2\%$ , symptomatic only) within the non-augmented control arm illustrates the critical impact of HF definition heterogeneity on reported outcomes. This definitional inconsistency is the primary driver of the considerable heterogeneity observed in the control-arm meta-analysis ( $I^2 = 93.3\%$ ) and underscores the urgent need for a consensus, tiered HF reporting framework in metastatic spine surgery research.
